# Supplementary material for: A series of new 3-D boratopolyoxovanadates containing five types of [KxOy]n building units
Source: Royal Society of Chemistry journal article supplement (doi:10.1039/c4ce00073k), 2014-01-01
Supplement: c4ce00073k4.pdf [file c4ce00073k4.pdf]

## A series of new 3-D boratopolyoxovanadates based on different K-O-

### K building blocks

Litao An, Jian Zhou\*, Hong-Ping Xiao, Xing Liu, Huahong Zou, Chun-Yang Pan,  
Meihua Liu, Jianhui Li

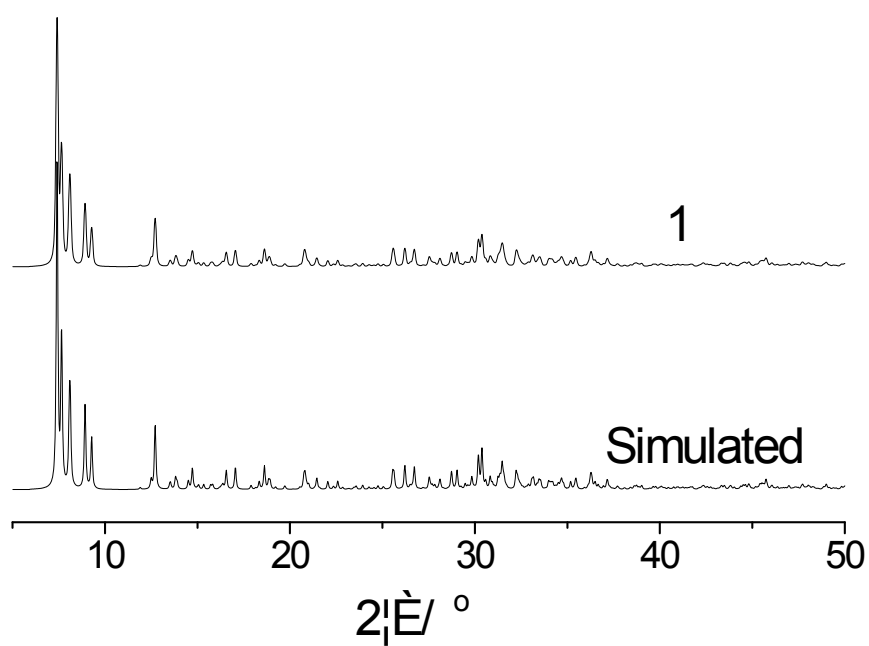

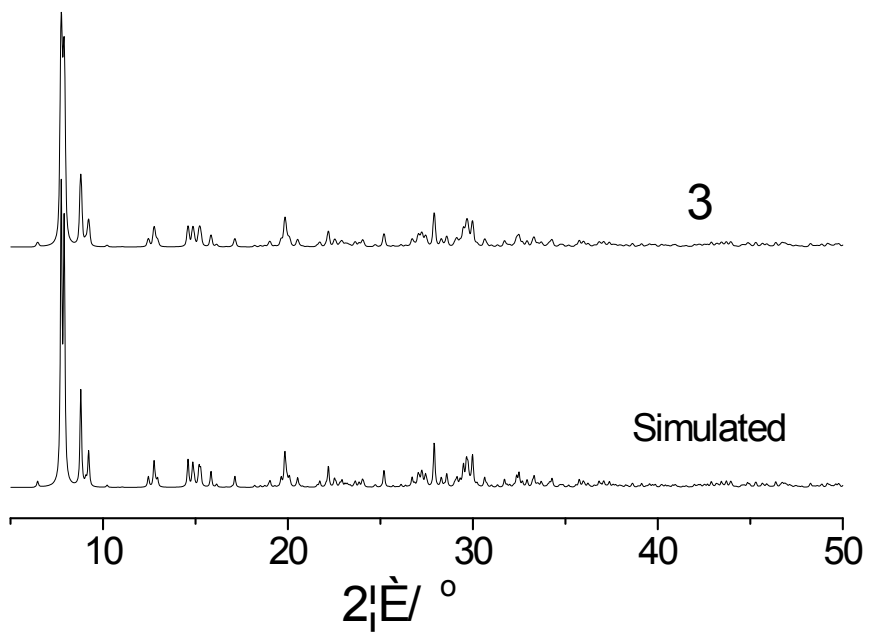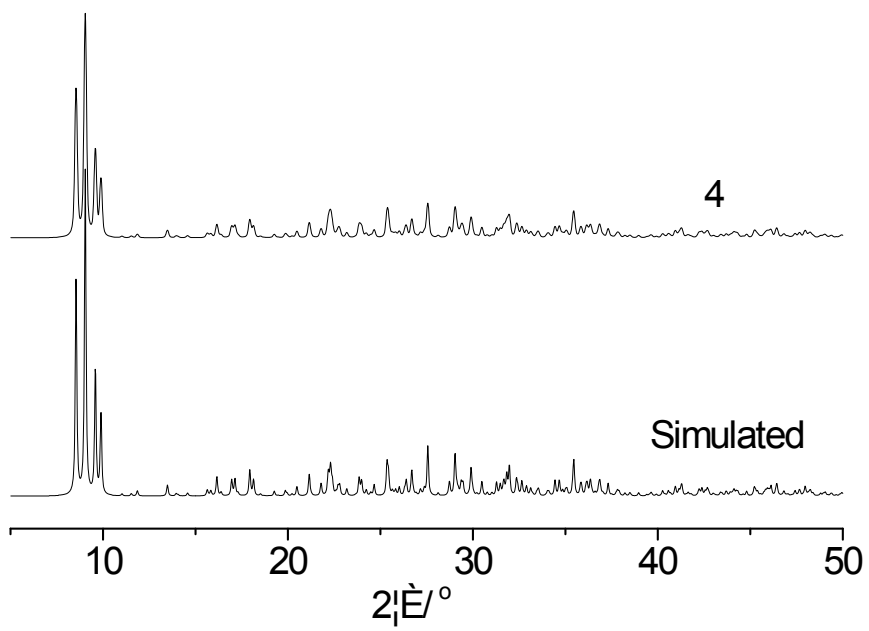

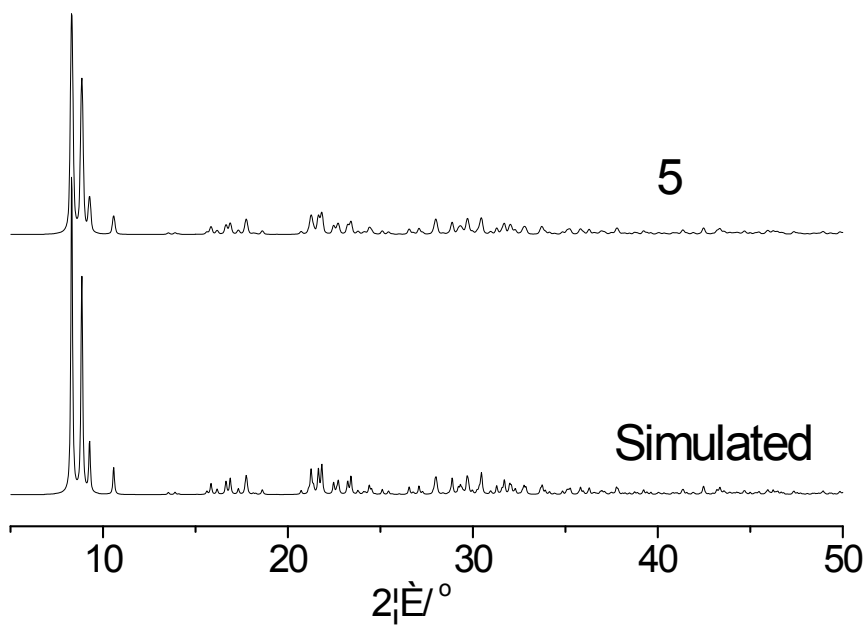

Fig. S1 Simulated and experimental powder XRD patterns of **1**, **3**, **4** and **5**.

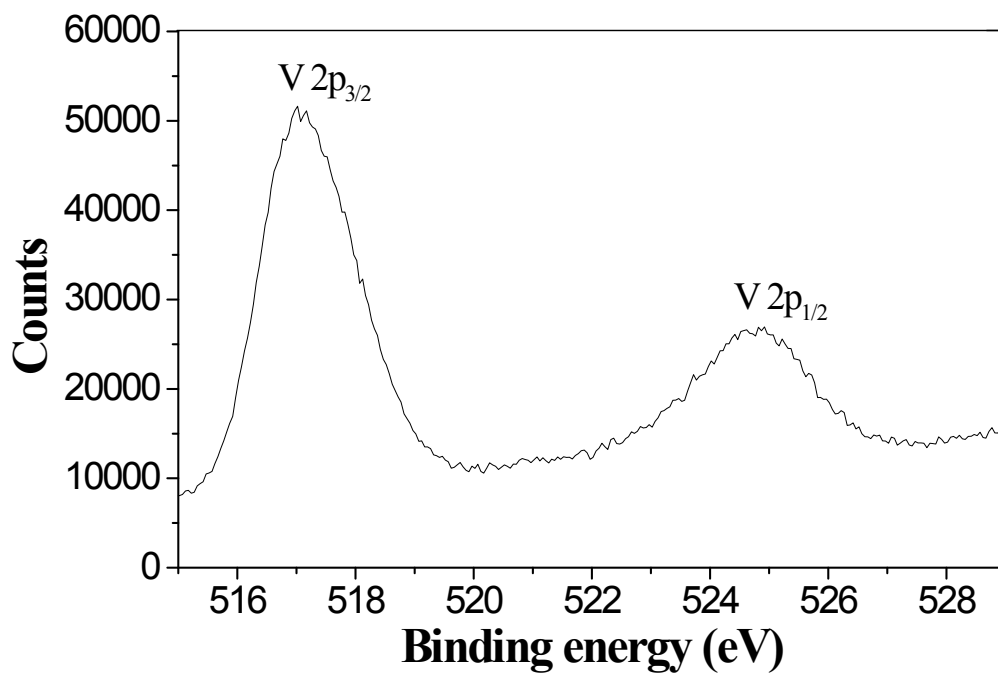

Fig. S2 Vanadium 2p XPS spectrum of **1**.

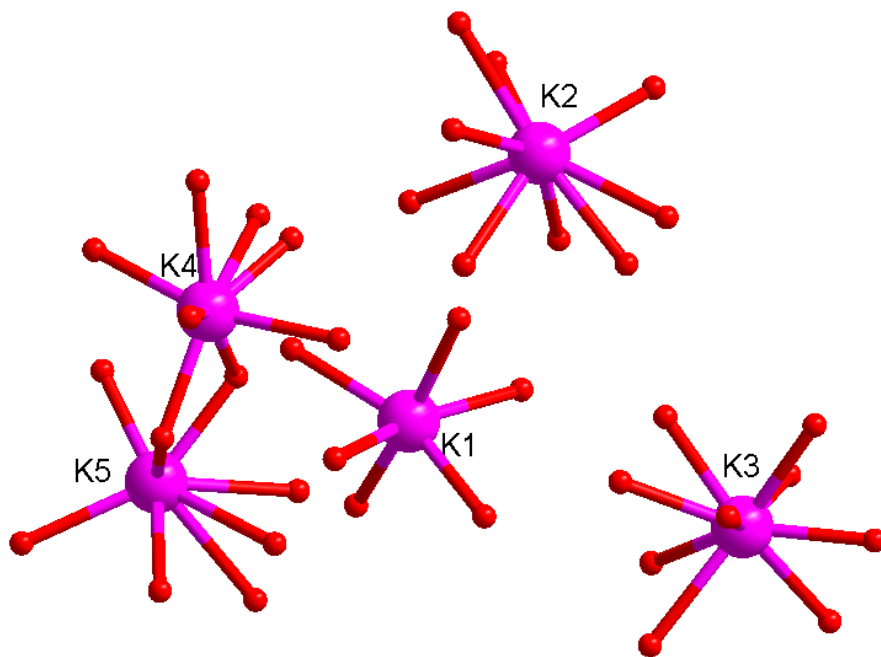

Fig. S3 The coordination environment of  $K^+$  ion in **2**.

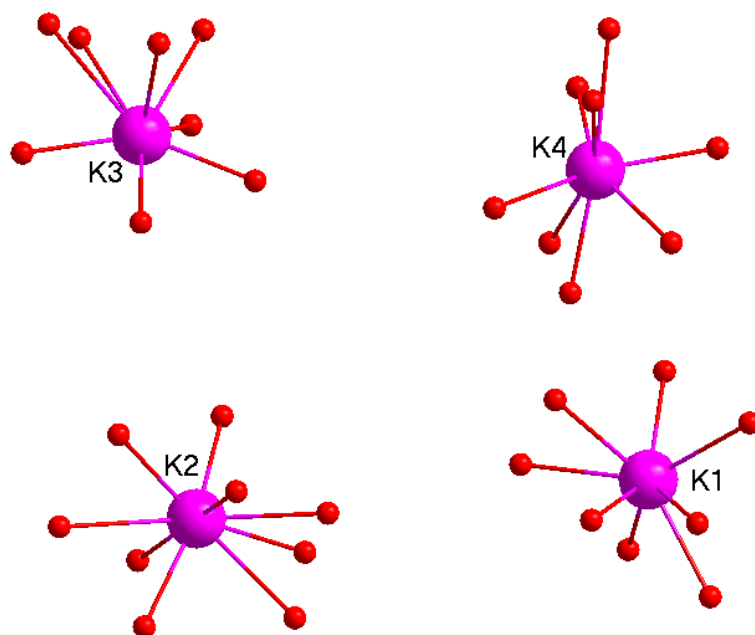

Fig. S4 The coordination environment of  $K^+$  ion in **3**.

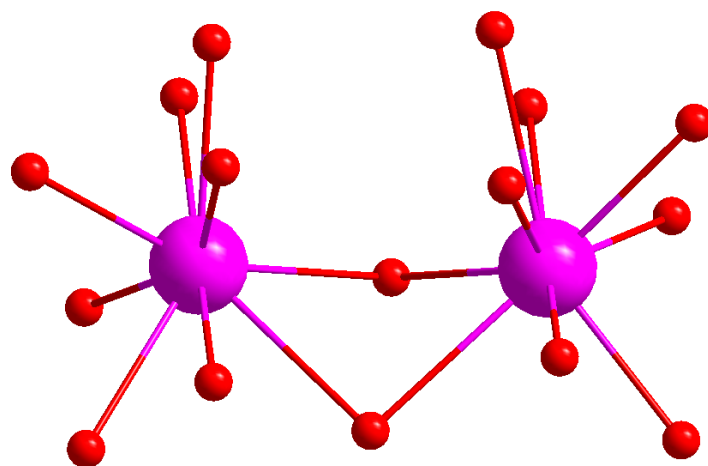

Fig. S5 Structure of dimeric  $[K_2O_{16}]$  unit in **5**.

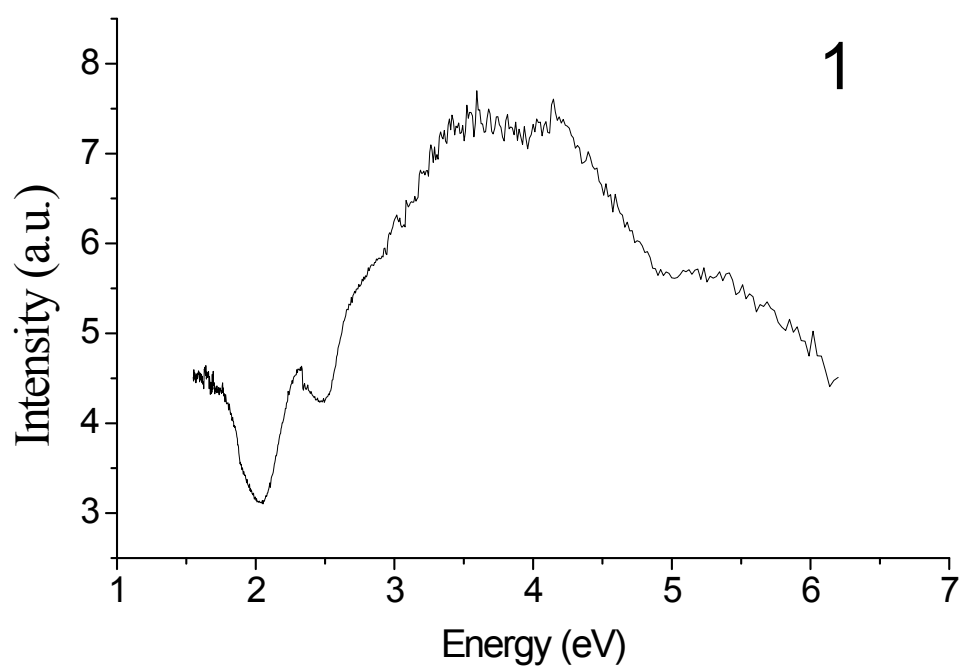

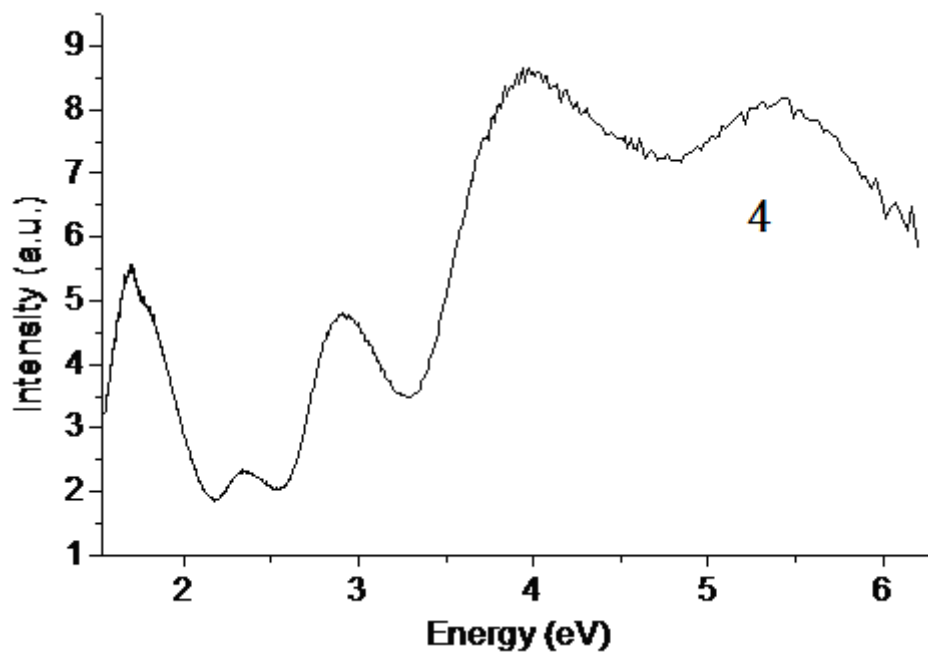

Fig. S6 the solid-state reflectance spectra of 1 and 4.

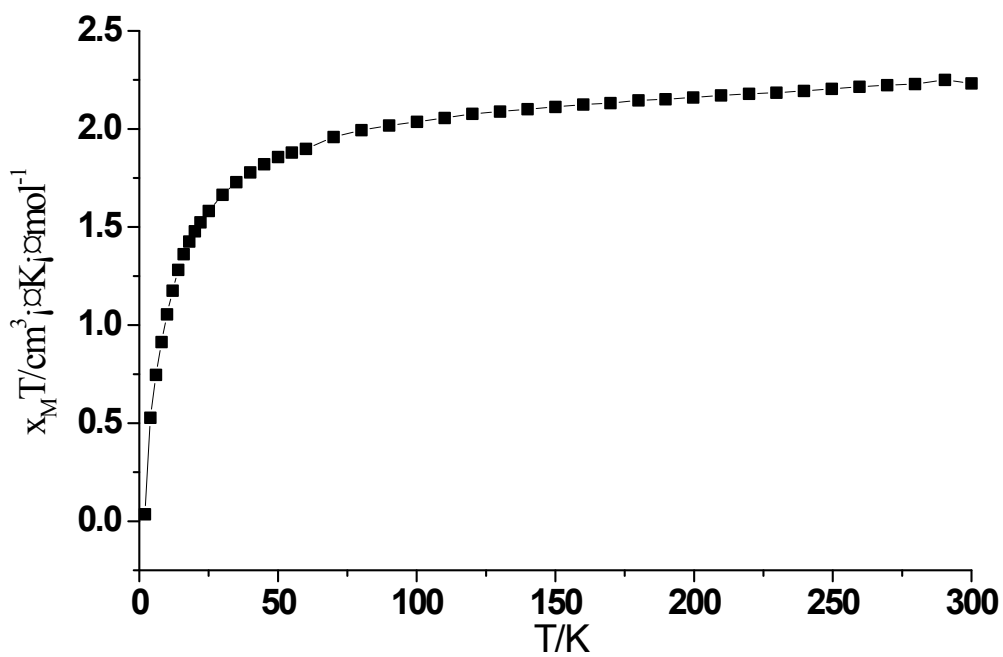

Fig. S7 Plot of  $\chi_M T$  vs T for 4.

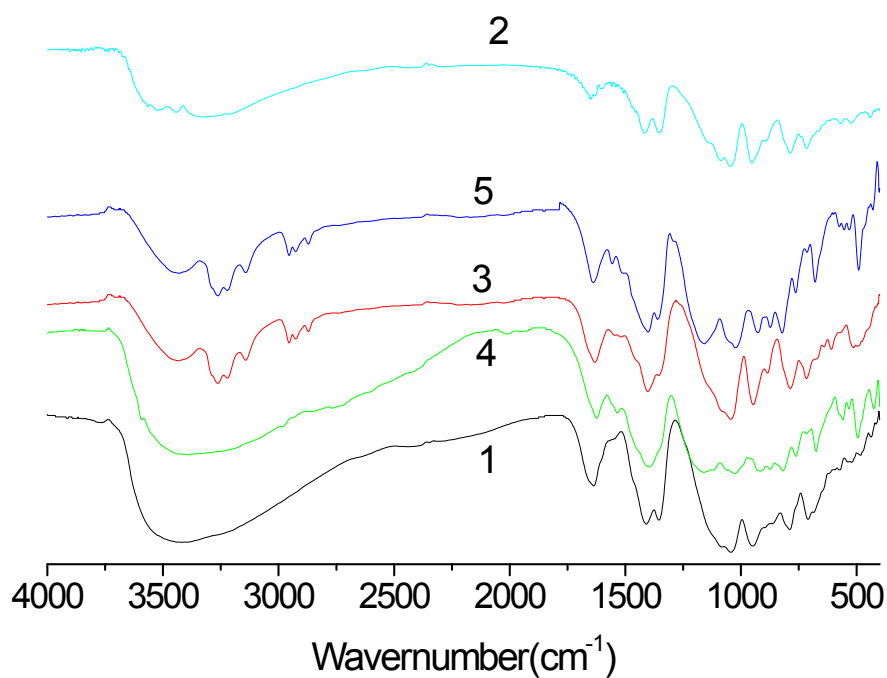

Fig. S8 The IR spectra of 1-5.

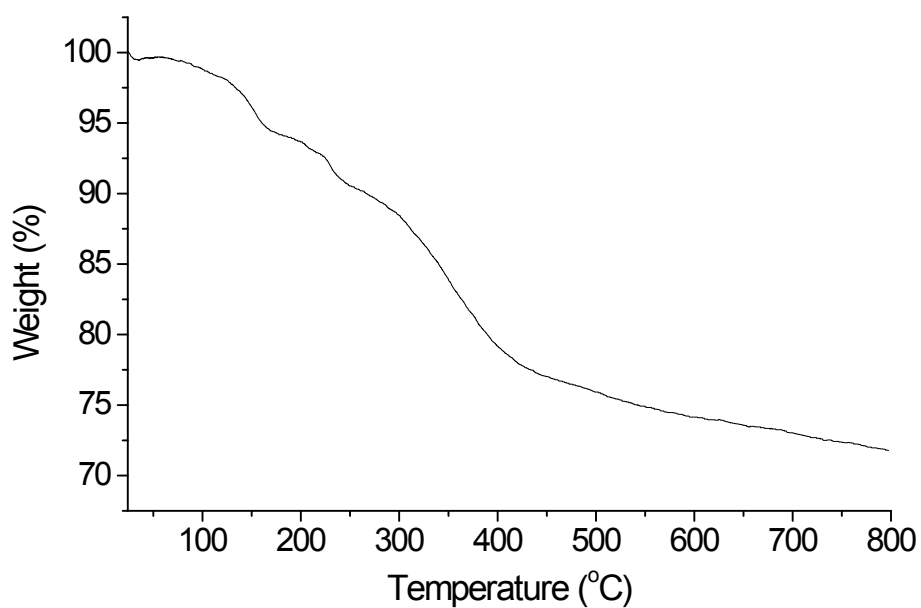

Fig. S9 Thermogravimetric analyses curves of 5.

Thermogravimetric analysis of **5** was carried out in  $N_2$  from 25 to 800 °C with a heating rate of 10 °C·min<sup>-1</sup>. A three-step weight loss occurs in the range of 25-700 °C which is related to the removal of free water molecules, coordinated water molecules, -OH groups and the  $H_3dien^{3+}$  ions (found, 27.0 %; calcd, 26.5 %).
